# Supplementary material for: Highest Composition Dissimilarity among Phytoplankton Communities at Intermediate Environmental Distances across High-Altitude Tropical Lakes
Source: MDPI journal article supplement (doi:10.3390/w13101378), 2021-05-15
Supplement: s1 [file s1]

## Article

# Highest Composition Dissimilarity Among Phytoplankton Communities at Intermediate Environmental Distances across High-Altitude Tropical Lakes

Alonso Cartuche <sup>1,2</sup>, Kalina M. Manoylov <sup>3,\*</sup>, Bastiaan W. Ibelings <sup>1</sup>, and Patrick Venail <sup>1,4</sup>

<sup>1</sup> Microbial Ecology Group, Department F.A. Forel for Environmental and Aquatic Sciences and Institute for Environmental Sciences, University of Geneva, 66 Boulevard Carl Vogt, 1205 Geneva, Switzerland; vic-tor.cartuche@unl.edu.ec (A.C.); Bastiaan.Ibelings@unige.ch (B.W.I.); pvenail@utec.edu.pe (P.V.)

<sup>2</sup> Ingeniería Ambiental, Universidad Nacional de Loja, Ciudad Universitaria Guillermo Falconí, Loja 110150, Ecuador

<sup>3</sup> Department of Biological and Environmental Sciences, Georgia College and State University, Milledgeville, GA 31061, USA

<sup>4</sup> Centro de Investigación y Tecnología del Agua-CITA, Departamento de Ingeniería Ambiental, Universidad de Ingeniería y Tecnología-UTEC, Lima 15063, Perú

\* Correspondence: kalina.manoylov@gcsu.edu

## Supplementary Materials

**Table S1.** Geographical coordinates, surface, altitude and maximum depth of the lakes included in this study.

| Lake | Latitude   | Longitude   | Surface (ha) | Altitude (m.a.s.l) | Maximum depth (m) |
|------|------------|-------------|--------------|--------------------|-------------------|
| 1    | 3.620244 S | 79.079878 W | 12.41        | 3323               | 8.7               |
| 2    | 3.621038 S | 79.071126 W | 0.81         | 3323               | 1.9               |
| 3    | 3.618497 S | 79.072945 W | 0.68         | 3334               | 1.6               |
| 4    | 3.606881 S | 79.087085 W | 0.98         | 3327               | 1.8               |
| 6    | 3.608667 S | 79.064888 W | 1.06         | 3310               | 1.5               |
| 7    | 3.606749 S | 79.060517 W | 0.96         | 3316               | 1.9               |
| 8    | 3.607539 S | 79.057050 W | 1.47         | 3328               | 1.6               |
| 9    | 3.604869 S | 79.058029 W | 2.87         | 3318               | 3.5               |
| 10   | 3.603289 S | 79.056183 W | 2.62         | 3309               | 8.2               |
| 12   | 3.597835 S | 79.073254 W | 0.6          | 3304               | 1.9               |
| 14   | 3.592871 S | 79.054675 W | 0.51         | 3345               | 1.6               |
| 16   | 3.590996 S | 79.053280 W | 0.73         | 3327               | 1.9               |
| 17   | 3.589561 S | 79.047823 W | 1.4          | 3303               | 1.5               |
| 18   | 3.587830 S | 79.051250 W | 0.57         | 3320               | 1.7               |
| 19   | 3.586014 S | 79.050869 W | 6.45         | 3320               | 6.7               |
| 21   | 3.581877 S | 79.045708 W | 0.78         | 3337               | 1.9               |
| 23   | 3.572517 S | 79.051543 W | 1.23         | 3359               | 1.5               |
| 24   | 3.571801 S | 79.053560 W | 0.9          | 3362               | 1.8               |
| 27   | 3.582893 S | 79.070948 W | 4.02         | 3288               | 6.2               |
| 28   | 3.588141 S | 79.068786 W | 4.23         | 3295               | 5                 |
| 29   | 3.585189 S | 79.070131 W | 0.74         | 3295               | 1.4               |
| 30   | 3.591361 S | 79.072685 W | 0.63         | 3297               | 1.9               |
| 31   | 3.589617 S | 79.072819 W | 0.55         | 3300               | 1.5               |
| 32   | 3.585770 S | 79.080393 W | 1.11         | 3304               | 1.8               |
